# Supplementary material for: Lower oceanic δ 13 C during the last interglacial period compared to the Holocene
Source: Copernicus journal article supplement (doi:10.5194/cp-17-507-2021), 2021-02-25
Supplement: Supplementary file 1 [file cp-17-507-2021-supplement.pdf]

Supplement of *Clim. Past*, 17, 507–528, 2021  
<https://doi.org/10.5194/cp-17-507-2021-supplement>  
© Author(s) 2021. This work is distributed under  
the Creative Commons Attribution 4.0 License.

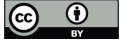

*Supplement of*

## **Lower oceanic $\delta^{13}\text{C}$ during the last interglacial period compared to the Holocene**

**Shannon A. Bengtson et al.**

*Correspondence to:* Shannon A. Bengtson (s.bengtson@unsw.edu.au)

The copyright of individual parts of the supplement might differ from the CC BY 4.0 License.

## Text S1

Though long term imbalances between weathering and burial of carbon are the likely cause for the  $\delta^{13}\text{C}$  LIG-Holocene anomaly (Jeltsch-Thömmes et al., 2019; Jeltsch-Thömmes and Joos, 2020), an alternate explanation may be that there was a change in the carbon stored in the terrestrial biosphere.

Past studies have estimated terrestrial carbon by considering conservation equations for total carbon and  $^{13}\text{C}$  during other periods (e.g. Menviel et al., 2017; Peterson et al., 2014), however there is no published proxy-based global estimate for the LIG terrestrial carbon. Here, we present mass balances of the total carbon and  $^{13}\text{C}$  for the LIG and the Holocene. We use our estimation of a mean oceanic  $\delta^{13}\text{C}$  anomaly of  $-0.2\text{‰}$  during the LIG than the Holocene to calculate the change in terrestrial carbon. These equations assume that the total mass of carbon and the mass of  $^{13}\text{C}$  within the atmosphere-land-ocean system did not change between the LIG and the Holocene and that it was merely redistributed between these three reservoirs, thereby excluding exchanges with the lithosphere. The mass balance for  $^{13}\text{C}$  during the LIG and the Holocene can be expressed as:

$$\begin{aligned} \int \int \int \delta^{13}\text{C}_{\text{AL}}\text{C}_{\text{AL}}dV + \int \int \int \delta^{13}\text{C}_{\text{OL}}\text{C}_{\text{OL}}dV + \int \int \delta^{13}\text{C}_{\text{TL}}\text{C}_{\text{TL}}dA \\ = \\ \int \int \int \delta^{13}\text{C}_{\text{AH}}\text{C}_{\text{AH}}dV + \int \int \int \delta^{13}\text{C}_{\text{OH}}\text{C}_{\text{OH}}dV + \int \int \delta^{13}\text{C}_{\text{TH}}\text{C}_{\text{TH}}dA, \end{aligned} \quad (1)$$

and for the total amount of carbon:

$$\begin{aligned} \int \int \int \text{C}_{\text{AL}}dV + \int \int \int \text{C}_{\text{OL}}dV + \int \int \text{C}_{\text{TL}}dA \\ = \\ \int \int \int \text{C}_{\text{AH}}dV + \int \int \int \text{C}_{\text{OH}}dV + \int \int \text{C}_{\text{TH}}dA, \end{aligned} \quad (2)$$

where for  $\delta^{13}\text{C}_{\text{location,period}}$  (‰) and  $\text{C}_{\text{location,period}}$  (Gt C) period is  $L$  (last interglacial period) or  $H$  (Holocene), and location is  $A$  (atmosphere),  $O$  (ocean), or  $T$  (terrestrial biosphere).  $V$  and  $A$  in the integrals are volume and area respectively.

Using these equations, we estimate the total amount of terrestrial carbon  
25 based on  $\text{CO}_2$  and  $\delta^{13}\text{CO}_2$  from ice cores and our estimate of the mean ocean  
 $\delta^{13}\text{C}$  anomaly of 0.2 ‰ in the ocean.

We estimate the total terrestrial carbon at 2,320 Gt C during the Holocene.  
This is 50 Gt C less than the pre-industrial estimate of 2,370 Gt C from Köhler  
and Fischer (2004) and Ciais et al. (2012) and accounts for the difference between  
30 PI and the Holocene based on ice core estimates (Elsig et al., 2009a). The  
Holocene ocean carbon reservoir is taken at  $36,830 \pm 170$  Gt C, which comes from  
the PI estimate from Ciais et al. (2012). We test the upper and lower limit of  
this estimate. We also test a scenario where we account for the difference in the  
ocean carbon reservoir between PI and the Holocene by assuming 115 Gt C less  
35 oceanic carbon than the minimum estimate of the Holocene (36,545 Gt C). We  
obtain 115 Gt C using a mass balance of the difference between the Holocene  
and PI in atmospheric  $\delta^{13}\text{CO}_2$  from Elsig et al. (2009b), the aforementioned  
terrestrial carbon difference of 50 Gt C, and loss of carbon due to sedimentation  
simulated in Menviel and Joos (2012).

40 In line with previous studies (e.g. Menviel et al., 2017), we assume that  
the atmospheric  $\delta^{13}\text{CO}_2$  and  $\text{CO}_2$  is homogeneous for both time periods. We  
estimate the atmospheric carbon content based on Eggleston et al. (2016) and  
Schneider et al. (2013) for the LIG (125–120 ka BP) and Holocene (7–2 ka BP),  
respectively, based on EPICA Dome C and Talos Dome ice core data (Fig. 1d).  
45 We estimate LIG and Holocene  $\text{CO}_2$  from the stacks found in Köhler et al.  
(2017) (Fig. 1a).

We use an average terrestrial carbon fractionation of -24.3 ‰ based on PI  
estimates and consider it to be unchanged from the Holocene. Since the average  
 $\delta^{13}\text{C}$  of the terrestrial biosphere depends on the ratio of different plant species,  
50 particularly the ratio of C3 to C4 plants, plant species distributions during  
both the LIG and the Holocene are required for an accurate estimate. However,  
while the available literature suggests significant vegetation changes at the LIG  
compared to the Holocene (e.g. Sánchez Goñi et al., 2005), there is no available  
global reconstruction of plant type distributions based on proxy data (Otto-  
55 Bliesner et al., 2016). Without a reliable estimate of average  $\delta^{13}\text{C}$  for the  
terrestrial biosphere during the LIG, we need to estimate a reasonable range of  
variation. The Last Glacial Maximum (LGM) mean terrestrial carbon value has  
been estimated as -23.3 ‰,  $\sim 1$  ‰ higher than during the Holocene (Joos et al.,  
2004; Ciais et al., 2012). Since vegetation distributions and climatic differences  
60 that affect  $\delta^{13}\text{C}$  were probably smaller between the LIG and the Holocene than  
between the LGM and the Holocene, the variation in mean terrestrial  $\delta^{13}\text{C}$   
should be less. So, we base our LIG  $\delta^{13}\text{C}$  estimate on the PI value but we  
consider 1 ‰ as the maximum variability we could expect on this estimate.  
We therefore test a mean terrestrial  $\delta^{13}\text{C}$  of  $-24.3 \pm 0.5$  ‰ for the LIG in our  
65 calculations.

To our knowledge, total oceanic carbon has not been estimated for the LIG  
in any prior studies. Assuming that the total carbon content has remained the  
same across the two time periods, we use the two equations (Equations 1 and  
2) simultaneously by substituting the unknown global ocean carbon content

70 for the LIG. After this, we calculate the global terrestrial carbon content as per Equation 3 using the estimates of  $\delta^{13}\text{C}$  of the ocean for the LIG and the Holocene from this study.

$$C_{\text{TL}} = \frac{C_{\text{AH}}\delta^{13}C_{\text{AH}} + C_{\text{OH}}\delta^{13}C_{\text{OH}} + C_{\text{TH}}\delta^{13}C_{\text{TH}} - C_{\text{AL}}\delta^{13}C_{\text{AL}} - \delta^{13}C_{\text{OL}}(C_{\text{AH}} + C_{\text{OH}} + C_{\text{TH}} - C_{\text{AL}})}{\delta^{13}C_{\text{TL}} - \delta^{13}C_{\text{OL}}} \quad (3)$$

We obtain  $\sim 310 \pm 44$  Gt C less terrestrial carbon during the LIG compared  
 75 to the Holocene following the scenarios detailed above (Table S1). The terrestrial carbon storage value is most sensitive to the uncertainty in the LIG mean terrestrial  $\delta^{13}\text{C}$ , while the results are relatively robust to uncertainties in the marine carbon reservoirs. Furthermore, using this estimate with Equation 2 we estimate a global ocean carbon reservoir to be 252-338 Gt C greater during the  
 80 LIG compared to the Holocene.

Even though these calculations suggest that the carbon stored in soils at the LIG was lower than during the Holocene, our mass balance approach contains significant uncertainties due to the closed system assumption. We therefore suggest that imbalances in the burial and weathering fluxes of carbon explain  
 85 the 0.2 ‰ LIG-Holocene anomaly.

Table S1: Global mass balance sensitivity analysis variable inputs and calculated results. Variable estimates: pre-industrial oceanic carbon ( $C_{OP}$ , Gt C) and  $\delta^{13}\text{C}$  for the last interglacial terrestrial biosphere ( $\delta^{13}\text{C}_{TL}$ , ‰). Calculated results: last interglacial oceanic carbon ( $C_{OL}$ , Gt C), last interglacial terrestrial carbon ( $C_{TL}$ , Gt C) and the change in terrestrial carbon from LIG to pre-industrial ( $\Delta C_T$ , ‰).

| $C_{OP}$ | $\delta^{13}\text{C}_{TL}$ | $C_{OL}$ | $C_{TL}$ | $\Delta C_T$ |
|----------|----------------------------|----------|----------|--------------|
| 36545    | -24.8                      | 36879    | 1999     | -350         |
| 36545    | -24.3                      | 36839    | 2040     | -309         |
| 36545    | -23.8                      | 36796    | 2083     | -266         |
| 36545    | -24.8                      | 36879    | 1999     | -350         |
| 36545    | -24.3                      | 36839    | 2040     | -309         |
| 36545    | -23.8                      | 36796    | 2083     | -266         |
| 36660    | -24.8                      | 36995    | 1999     | -350         |
| 36660    | -24.3                      | 36955    | 2039     | -310         |
| 36660    | -23.8                      | 36912    | 2082     | -267         |
| 36660    | -24.8                      | 36995    | 1999     | -350         |
| 36660    | -24.3                      | 36955    | 2039     | -310         |
| 36660    | -23.8                      | 36912    | 2082     | -267         |
| 36830    | -24.8                      | 37167    | 1997     | -352         |
| 36830    | -24.3                      | 37126    | 2038     | -311         |
| 36830    | -23.8                      | 37083    | 2080     | -269         |
| 36830    | -24.8                      | 37167    | 1997     | -352         |
| 36830    | -24.3                      | 37126    | 2038     | -311         |
| 36830    | -23.8                      | 37083    | 2080     | -269         |
| 37000    | -24.8                      | 37338    | 1996     | -353         |
| 37000    | -24.3                      | 37297    | 2037     | -312         |
| 37000    | -23.8                      | 37255    | 2079     | -270         |
| 37000    | -24.8                      | 37338    | 1996     | -353         |
| 37000    | -24.3                      | 37297    | 2037     | -312         |
| 37000    | -23.8                      | 37255    | 2079     | -270         |

## Supporting Figures

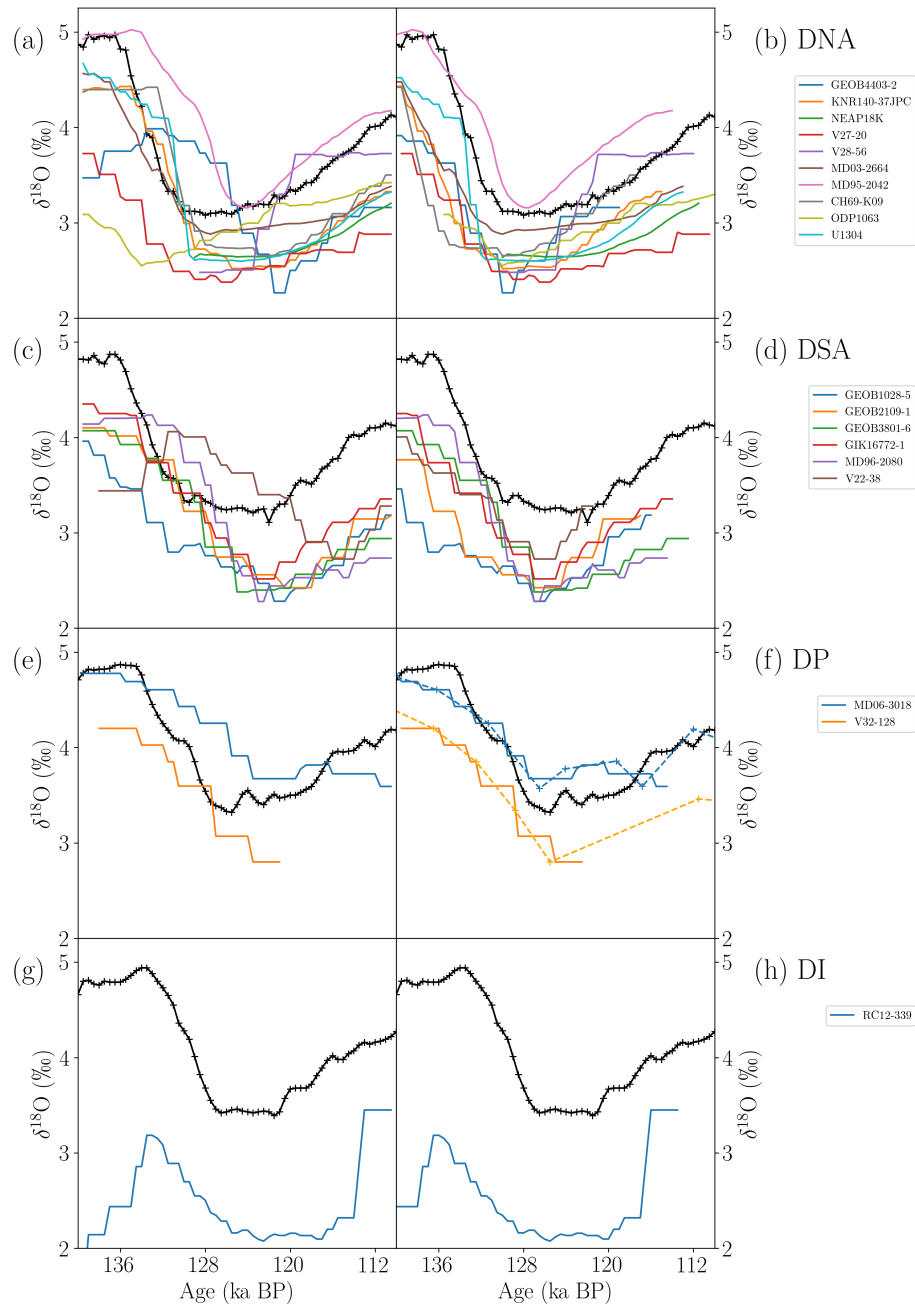

Figure S1: Benthic  $\delta^{18}\text{O}$  from cores which had not been previously aligned to LS16: before (panels a, c, e, g) and after (panels b, d, f, h) adjustments applied in this study to align the  $\delta^{18}\text{O}$  minimum from each core to the nearest LS16 stack  $\delta^{18}\text{O}$  minimum (black lines, Lisiecki and Stern (2016)) covering the LIG. Regions: DNA: deep north Atlantic, DSA: deep south Atlantic, DP: deep Pacific, DI: deep Indian.

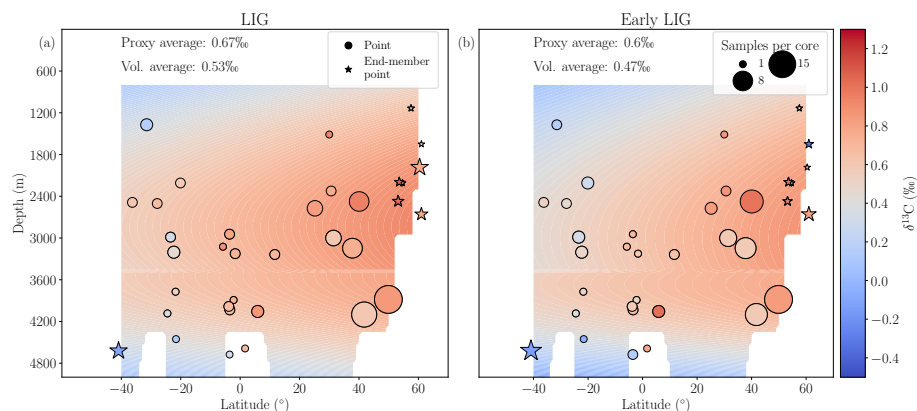

Figure S2: Reconstructed Atlantic  $\delta^{13}\text{C}$  (‰) meridional section during the LIG (125–120 ka BP) and Early LIG (128–123 ka BP). The circular points represent the proxy data which shows the average  $\delta^{13}\text{C}$  with colour and the number of points per core with size. The stars represent the proxy data which make up the end-members. Background shading shows the reconstructed  $\delta^{13}\text{C}$  using a quadratic statistical regression of the proxy data following the method described in Bengtson et al. (2019).

## References

- Bengtson, S. A., Meissner, K. J., Menviel, L., A. Sisson, S., and Wilkin, J.: Evaluating the extent of North Atlantic Deep Water and the mean Atlantic  $\delta^{13}\text{C}$  from statistical reconstructions, *Paleoceanography and Paleoclimatology*, <https://doi.org/10.1029/2019PA003589>, 2019.
- Ciais, P., Tagliabue, A., Cuntz, M., Bopp, L., Scholze, M., Hoffmann, G., Lourdou, A., Harrison, S. P., Prentice, I. C., Kelley, D. I., Koven, C., and Piao, S. L.: Large inert carbon pool in the terrestrial biosphere during the Last Glacial Maximum, *Nature Geoscience*, 5, 74–79, <https://doi.org/10.1038/ngeo1324>, URL <https://www.nature.com/articles/ngeo1324>, 2012.
- Eggleston, S., Schmitt, J., Bereiter, B., Schneider, R., and Fischer, H.:  $\text{CO}_2$  concentration and stable isotope ratios of three Antarctic ice cores covering the period from 149.4 - 1.5 kyr before 1950, *PANGAEA*, <https://doi.org/10.1594/PANGAEA.859181>, URL <https://doi.org/10.1594/PANGAEA.859181>, 2016.
- Elsig, J., Schmitt, J., Leuenberger, D., Schneider, R., Eyer, M., Leuenberger, M., Joos, F., Fischer, H., and Stocker, T. F.: Carbon isotopic record of  $\text{CO}_2$  from the Holocene of the Dome C



- ice core, PANGAEA, <https://doi.org/10.1594/PANGAEA.728699>, URL <https://doi.org/10.1594/PANGAEA.728699>, 2009a.
- 110 Elsig, J., Schmitt, J., Leuenberger, D., Schneider, R., Eyer, M., Leuenberger, M., Joos, F., Fischer, H., and Stocker, T. F.: Stable isotope constraints on Holocene carbon cycle changes from an Antarctic ice core, *Nature*, 461, 507–510, <https://doi.org/10.1038/nature08393>, URL <https://www.nature.com/articles/nature08393>, 2009b.
- 115 Jeltsch-Thömmes, A. and Joos, F.: The response to pulse-like perturbations in atmospheric carbon and carbon isotopes, *Climate of the Past Discussions*, pp. 1–36, <https://doi.org/10.5194/cp-2019-107>, URL <https://www.clim-past-discuss.net/cp-2019-107/>, 2020.
- 120 Jeltsch-Thömmes, A., Battaglia, G., Cartapanis, O., Jaccard, S. L., and Joos, F.: Low terrestrial carbon storage at the Last Glacial Maximum: constraints from multi-proxy data, *Climate of the Past*, 15, 849–879, <https://doi.org/10.5194/cp-2019-107>, URL <https://www.clim-past.net/15/849/2019/>, 2019.
- 125 Joos, F., Gerber, S., Prentice, I. C., Otto-Bliesner, B. L., and Valdes, P. J.: Transient simulations of Holocene atmospheric carbon dioxide and terrestrial carbon since the Last Glacial Maximum, *Global Biogeochemical Cycles*, 18, <https://doi.org/10.1029/2003GB002156>, URL <https://agupubs.onlinelibrary.wiley.com/doi/abs/10.1029/2003GB002156>, 2004.
- 130 Köhler, P. and Fischer, H.: Simulating changes in the terrestrial biosphere during the last glacial/interglacial transition, *Global and Planetary Change*, 43, 33–55, <https://doi.org/10.1016/j.gloplacha.2004.02.005>, URL <http://www.sciencedirect.com/science/article/pii/S0921818104000542>, 2004.
- 135 Köhler, P., Nehrbass-Ahles, C., Schmitt, J., Stocker, T. F., and Fischer, H.: Continuous record of the atmospheric greenhouse gas carbon dioxide (CO<sub>2</sub>), raw data, PANGAEA, <https://doi.org/10.1594/PANGAEA.871265>, URL <https://doi.pangaea.de/10.1594/PANGAEA.871265>, 2017.
- 140 Lisiecki, L. E. and Stern, J. V.: Regional and global benthic  $\delta^{18}\text{O}$  stacks for the last glacial cycle, *Paleoceanography*, 31, 2016PA003002, <https://doi.org/10.1002/2016PA003002>, URL <http://onlinelibrary.wiley.com/doi/10.1002/2016PA003002/abstract>, 2016.
- 145 Menviel, L. and Joos, F.: Toward explaining the Holocene carbon dioxide and carbon isotope records: Results from transient ocean carbon cycle-climate simulations, *Paleoceanography*, 27, <https://doi.org/10.1029/2011PA002224>, URL <https://agupubs.onlinelibrary.wiley.com/doi/abs/10.1029/2011PA002224>, 2012.

- Menviel, L., Yu, J., Joos, F., Mouchet, A., Meissner, K. J., and England, M. H.: Poorly ventilated deep ocean at the Last Glacial Maximum inferred from carbon isotopes: A data-model comparison study, *Paleoceanography*, 32, 2–17, <https://doi.org/10.1002/2016PA003024>, URL <https://agupubs.onlinelibrary.wiley.com/doi/abs/10.1002/2016PA003024>, 2017.
- 150
- Otto-Bliesner, B. L., Braconnot, P., Harrison, S. P., Lunt, D. J., Abe-Ouchi, A., Albani, S., Bartlein, P. J., Capron, E., Carlson, A. E., Dutton, A., Fischer, H., Goelzer, H., Govin, A., Haywood, A., Joos, F., Legrande, A. N., Lipscomb, W. H., Lohmann, G., Mahowald, N., Nehrbass-Ahles, C., Pausata, F. S.-R., Peterschmitt, J.-Y., Phipps, S., and Renssen, H.: The PMIP4 contribution to CMIP6 - Part 2: Two Interglacials, Scientific Objective and Experimental Design for Holocene and Last Interglacial Simulations, *Geosci. Model Dev. Discuss.*, 2016, 1–36, <https://doi.org/10.5194/gmd-2016-279>, URL <http://www.geosci-model-dev-discuss.net/gmd-2016-279/>, 2016.
- 155
- Peterson, C. D., Lisiecki, L. E., and Stern, J. V.: Deglacial whole-ocean  $\delta^{13}\text{C}$  change estimated from 480 benthic foraminiferal records, *Paleoceanography*, 29, 549–563, <https://doi.org/10.1002/2013PA002552>, URL <https://agupubs.onlinelibrary.wiley.com/doi/abs/10.1002/2013PA002552>, 2014.
- 160
- Sánchez Goñi, M. F., Loutre, M. F., Crucifix, M., Peyron, O., Santos, L., Duprat, J., Malaizé, B., Turon, J. L., and Peypouquet, J. P.: Increasing vegetation and climate gradient in Western Europe over the Last Glacial Inception (122–110 ka): data-model comparison, *Earth and Planetary Science Letters*, 231, 111–130, <https://doi.org/10.1016/j.epsl.2004.12.010>, URL <http://www.sciencedirect.com/science/article/pii/S0012821X04007162>, 2005.
- 170
- Schneider, R., Schmitt, J., Köhler, P., Joos, F., and Fischer, H.: A reconstruction of atmospheric carbon dioxide and its stable carbon isotopic composition from the penultimate glacial maximum to the last glacial inception, *Climate of the Past*, 9, 2507–2523, <https://doi.org/10.5194/cp-9-2507-2013>, URL <http://www.clim-past.net/9/2507/2013/>, 2013.
- 175
